# Supplementary material for: Empagliflozin Suppresses the Differentiation/Maturation of Human Epicardial Preadipocytes and Improves Paracrine Secretome Profile
Source: PubMed Central journal article supplement — JACC Basic Transl Sci. 2023 Aug 9;8(9):1081–97. doi: 10.1016/j.jacbts.2023.05.007 (PMC10544075; doi:10.1016/j.jacbts.2023.05.007), 2023-08-09
Supplement: mmc1.pdf [file mmc1.pdf]

**Supplemental Figure 2.** (A) SGLT2 expression in preadipocyte was not decreased on day 14 without the induction of differentiation. (B) Quantification of SGLT2 in the preadipocyte on day 0 and day 14. (C) Quantification of CD105 in the preadipocyte on day 0 and day 14. *SGLT1* (D), *SGLT4* (E), *SGLT5* (F) and *SGLT6* (G) expression levels were not significantly reduced in the differentiated adipocyte compared with the preadipocyte. Data are presented as mean  $\pm$  SD and compared using t-test.

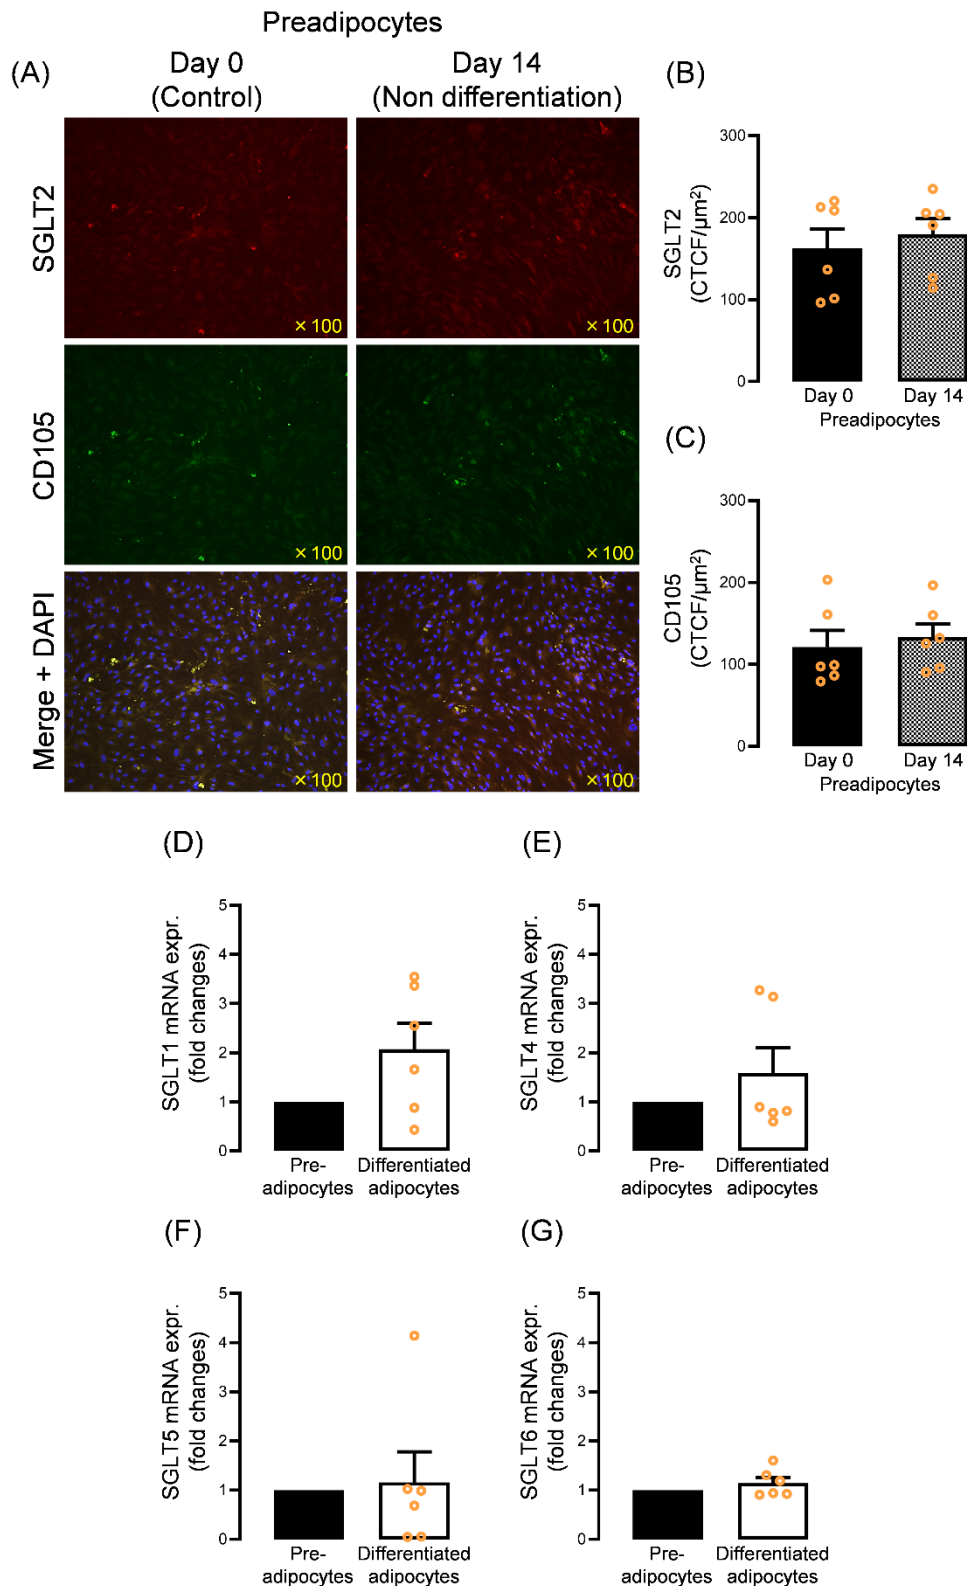

**Supplemental Figure 3.** (A) Proliferation of isolated human epicardial preadipocyte was not inhibited by the incubation with empagliflozin dose-dependent. (B) The expression of *CD105* in the preadipocyte was not affected by empagliflozin. Data are presented as mean  $\pm$  SD and compared using t-test.

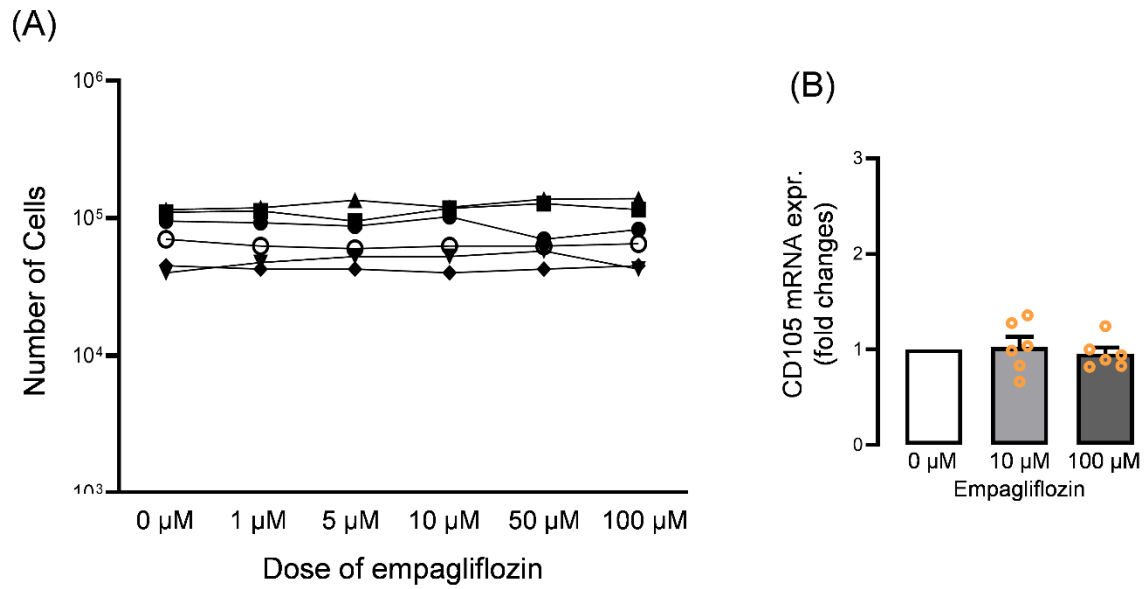

**Supplemental Figure 4.** Gene expression levels of *PPAR $\gamma$*  (A) and *CEBPA* (B) were not significantly affected, while those of *FABP4* (C) was significantly lower in patients receiving SGLT2 inhibitors than in patients receiving other anti-diabetic agents in the human EAT. Data are presented as mean  $\pm$  SD and compared using Mann-Whitney *U*-test. \*\* $p < 0.01$ .

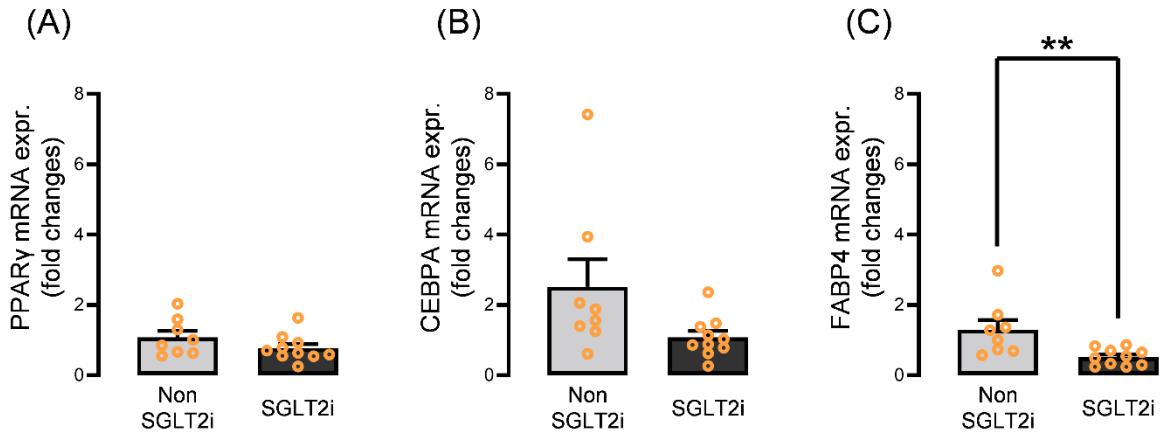

**Supplemental Figure 5.** Adipocytes incubated with lower doses of empagliflozin (1  $\mu$ M, 5  $\mu$ M, 10  $\mu$ M) before differentiation showed dose-dependent downregulations of *IL6* (A), *MCPI* (B) and *FABP4* (C). The incubation with 5  $\mu$ M or 10  $\mu$ M empagliflozin significantly reduced *IL6*, *MCPI*, and *FABP4* mRNA expression. Data are presented as mean  $\pm$  SD and compared using t-test. \* $p$ <0.05.

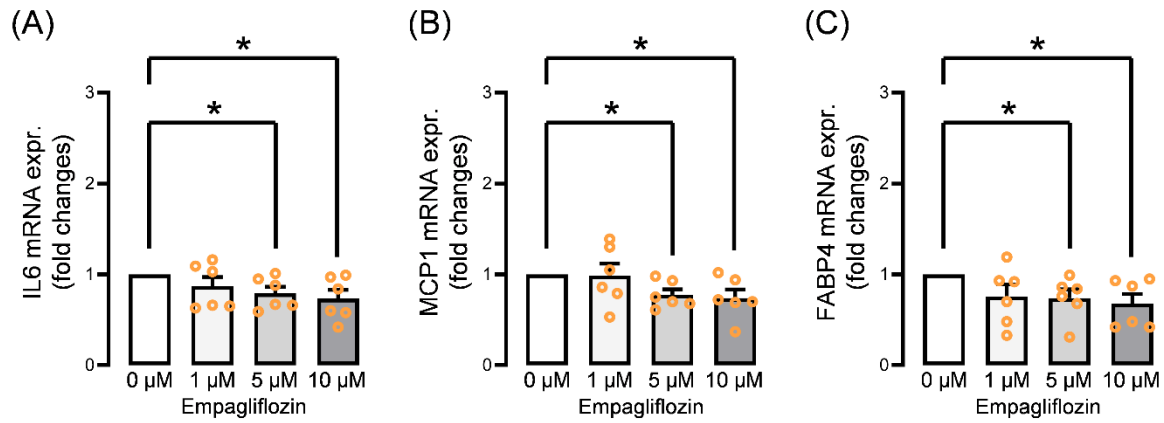

**Supplemental Figure 6.** There are no significant differences in *IL6* (A), *MCP1* (B) and *TGFβ* (C) between the preadipocytes and differentiated adipocytes, while the *IL1α* (D) and *IL1β* (E) gene expression levels were significantly reduced in the differentiated adipocytes. Data are presented as mean  $\pm$  SD and compared using t-test. \*\*\* $p < 0.001$ .

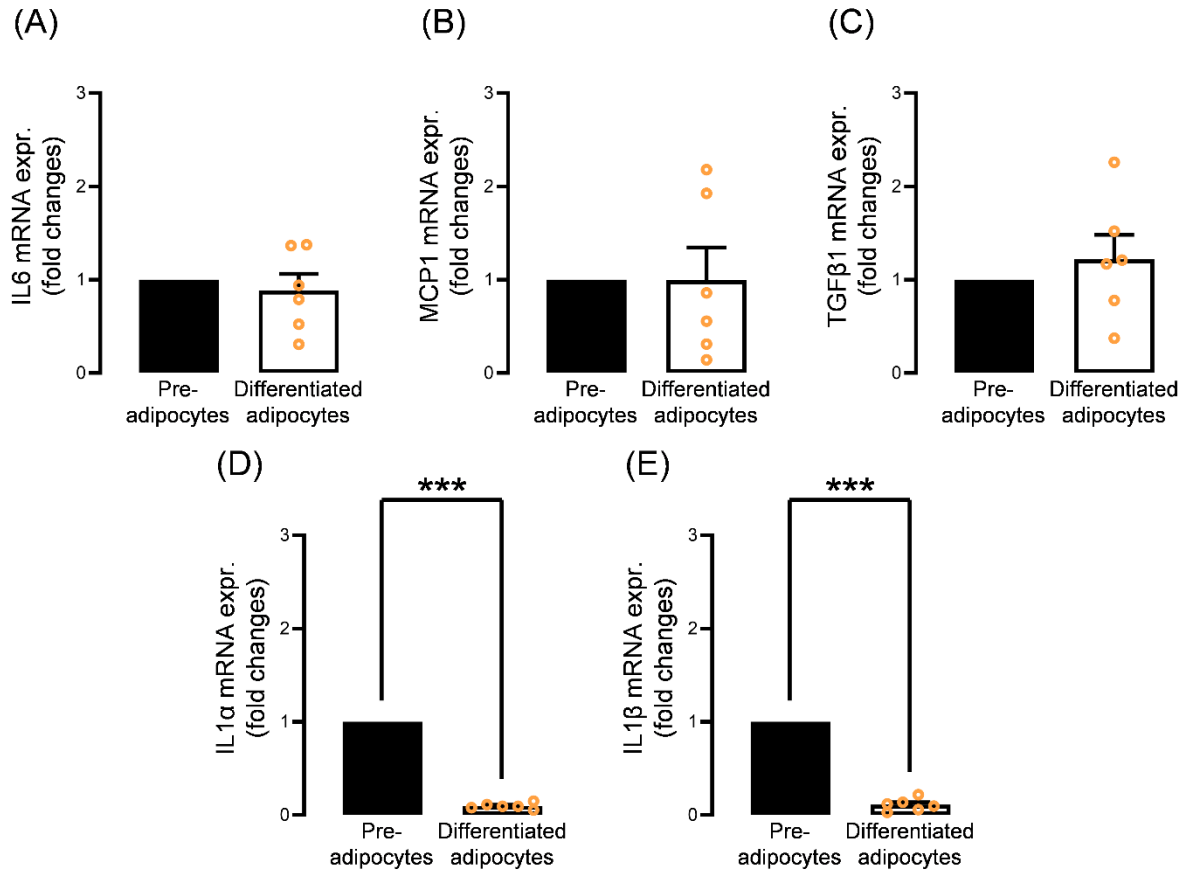

**Supplemental Figure 7.** (A) Lucigenin-enhanced chemiluminescence revealed that co-culture with empagliflozin-treated adipocytes reduced basal  $O_2^{\cdot-}$  level generation in a dose-dependent manner. (B) IL6 protein levels in the supernatant from the adipocyte before and after the co-culture with iPS-ACM were not significantly different. Incubation of human iPS-ACM with IL6 showed increased basal  $O_2^{\cdot-}$  (C) Co-incubation with cardiomyocyte did not affect the morphology and lipid content of the mature adipocytes (Oil-red O staining). (D) Oil-red O dye measured using spectrophotometer with an absorbance of 520 nm was not significantly changed after co-incubation with cardiomyocyte. (E) and NADPH-stimulated  $O_2^{\cdot-}$  (F) measured using luminometry compared with the control. Data are presented as mean  $\pm$  SD and compared using t-test or ANOVA. \* $p < 0.05$ .

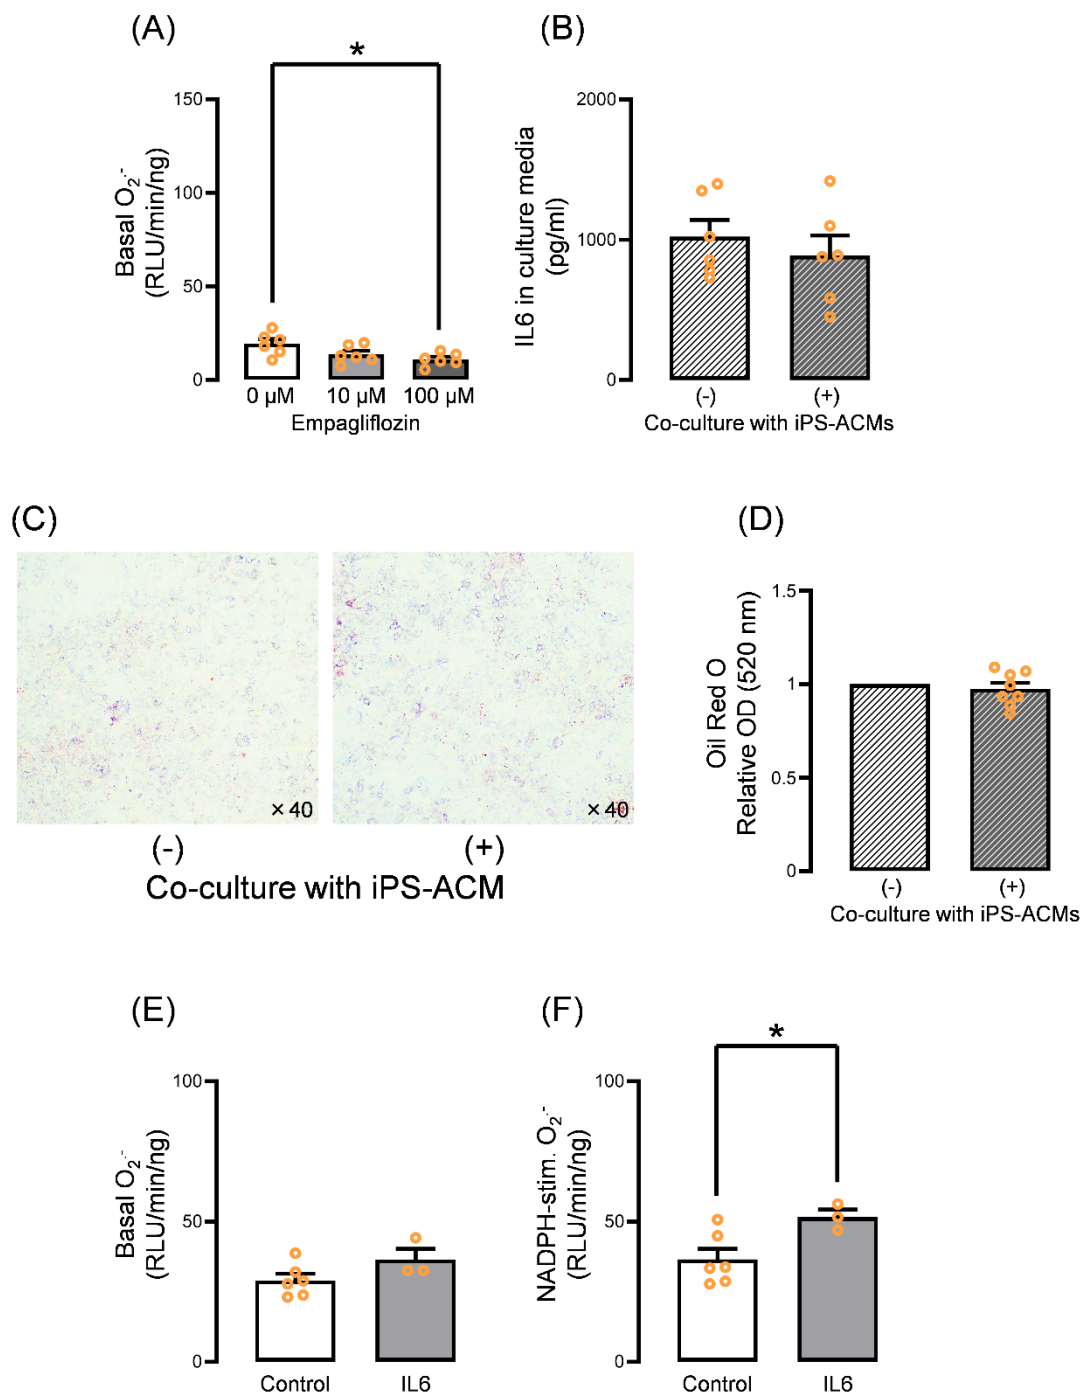





**Supplemental Table 1.** Demographic characteristics of the study participants in Study 2.

|                                   | Non-SGLT2i              | SGLT2i             | P value |
|-----------------------------------|-------------------------|--------------------|---------|
| Patients, n                       | 14                      | 15                 |         |
| Age (year)                        | 69.5 (66.5–5)           | 69 (66.5–74.5)     | 0.70    |
| Male sex                          | 11 (79.6%)              | 12 (80.0%)         | 0.93    |
| BMI (kg/m <sup>2</sup> )          | 22.94±3.94              | 24.03±2.63         | 0.39    |
| Surgery (combined)                |                         |                    |         |
| AVR / AS, AR                      | 3                       | 4                  |         |
| MVR / MS, MR                      | 1                       | 4                  |         |
| CABG / AP, OMI                    | 10                      | 8                  |         |
| Other / TAA, AAA                  | 4                       | 3                  |         |
| Hypertension                      | 9 (64.3%)               | 13 (86.7%)         | 0.18    |
| Dyslipidemia                      | 13 (92.9%)              | 13 (86.7%)         | 0.60    |
| T2DM                              | 14 (100%)               | 13 (86.7%)         | 0.16    |
| NYHA functional classification    |                         |                    |         |
| I                                 | 3 (21.4%)               | 2 (13.3%)          |         |
| II                                | 10 (71.4%)              | 9 (60.0%)          |         |
| III                               | 1 (7.1%)                | 3 (20.0%)          |         |
| IV                                | 0                       | 1 (6.7%)           |         |
| Laboratory data                   |                         |                    |         |
| TG (mg/dl)                        | 113.14±53.71            | 135.20±78.49       | 0.38    |
| HDL-C (mg/dl)                     | 54.04±18.08             | 48.29±12.81        | 0.34    |
| LDL-C (mg/dl)                     | 83.58±17.43             | 103.92±37.45       | 0.073   |
| FBS (mg/dl)                       | 135.43±52.06            | 140.79±46.61       | 0.78    |
| HbA1c (%)                         | 7.00±0.94               | 7.04±0.99          | 0.92    |
| Ccr (ml/min/1.73 m <sup>2</sup> ) | 58.45±20.90             | 63.61±26.75        | 0.68    |
| NT-proBNP (pg/ml)                 | 457.5 (227.75–1033.425) | 955 (174.5–2166.5) | 0.40    |
| Medication                        |                         |                    |         |
| ACE inhibitor/ARB                 | 11 (78.6%)              | 11 (73.3%)         | 0.75    |
| β-blocker                         | 2 (14.3%)               | 12 (80.0%)         | <0.001  |
| CCB                               | 6 (42.9%)               | 6 (40.0%)          | 0.88    |

|                      |            |            |       |
|----------------------|------------|------------|-------|
| ARNI                 | 0          | 0          | n/a   |
| Statin               | 12 (85.7%) | 13 (86.7%) | 0.94  |
| Diuretic             | 2 (14.3%)  | 8 (53.3%)  | 0.026 |
| SGLT2i               | 0          | 15 (100%)  | n/a   |
| DPP4i                | 14 (100%)  | 0          | n/a   |
| Insulin              | 0          | 0          | n/a   |
| Other anti-diabetics | 3 (21.4%)  | 0          | n/a   |
| Steroid              | 0          | 0          | n/a   |

BMI: Body mass index; AVR: Aortic valve replacement; AS: Aortic stenosis; AR: Aortic regurgitation, MVR: Mitral valve replacement; MS: Mitral stenosis; MR: Mitral regurgitation; CABG: Coronary artery bypass grafting; AP: Angina pectoris; OMI: Old myocardial infarction; TAA: Thoracic aortic aneurysm; AAA: Abdominal aortic aneurysm; T2DM: Type 2 diabetes mellitus; NYHA: New York Heart Association (functional classification); TG: Triglyceride; HDL-C: High-density lipoprotein cholesterol; LDL-C: Low-density lipoprotein cholesterol; FBS: Fasting blood sugar; HbA1c: hemoglobin A1c; Ccr: Creatinine clearance; NT-proBNP: N-terminal prohormone of brain natriuretic peptide; ACE: Angiotensin-converting enzyme; ARB: Angiotensin receptor blocker; CCB: Calcium channel blocker; ARNI: angiotensin receptor neprilysin inhibitor; SGLT2i: Sodium–glucose cotransporter two inhibitor; DPP4i: dipeptidyl peptidase four inhibitor. n/a: not applicable; n/a: not applicable; Values are presented as numbers (percentage), median [25th-75th percentiles] or mean  $\pm$  standard deviation.

**Supplemental Table 2.** Demographic characteristics of the study participants in Study 3.

|                                   | Non-AF        | AF                | P value |
|-----------------------------------|---------------|-------------------|---------|
| Patients, n                       | 19            | 19                |         |
| Age (year)                        | 73 (71–74.5)  | 72 (69.5–76)      | 0.79    |
| Male sex                          | 8 (42.1%)     | 15 (79.0%)        | 0.020   |
| BMI (kg/m <sup>2</sup> )          | 23.20±3.92    | 23.08±2.80        | 0.92    |
| Surgery (combined)                |               |                   |         |
| AVR / AS, AR                      | 9             | 9                 |         |
| MVR / MS, MR                      | 3             | 14                |         |
| CABG / AP, OMI                    | 6             | 1                 |         |
| Other / TAA, AAA                  | 7             | 3                 |         |
| Hypertension                      | 16 (84.2%)    | 9 (47.4%)         | 0.016   |
| Dyslipidemia                      | 12 (63.2%)    | 7 (36.8%)         | 0.11    |
| T2DM                              | 0             | 0                 | n/a     |
| NYHA functional classification    |               |                   |         |
| I                                 | 4 (21.1%)     | 3 (15.8%)         |         |
| II                                | 12 (63.2%)    | 11 (57.9%)        |         |
| III                               | 3 (15.8%)     | 5 (26.3%)         |         |
| IV                                | 0             | 0                 |         |
| CHADS <sub>2</sub> score          |               |                   |         |
| 0–2                               | 14            | 15                |         |
| 3–4                               | 5             | 4                 |         |
| 5–6                               | 0             | 0                 |         |
| Laboratory data                   |               |                   |         |
| TG (mg/dl)                        | 135.95±62.50  | 85.16±41.68       | 0.006   |
| HDL-C (mg/dl)                     | 53.12±15.70   | 57.76±11.65       | 0.31    |
| LDL-C (mg/dl)                     | 110.17±30.13  | 100.02±36.44      | 0.36    |
| FBS (mg/dl)                       | 97.28±12.04   | 102.05±20.56      | 0.39    |
| HbA1c (%)                         | 5.92±0.41     | 5.81±0.46         | 0.42    |
| Ccr (ml/min/1.73 m <sup>2</sup> ) | 69.87±39.27   | 59.49±25.26       | 0.34    |
| NT-proBNP (pg/ml)                 | 230 (136–485) | 1373 (887.5–2083) | <0.001  |

|                      |            |            |        |
|----------------------|------------|------------|--------|
| Echocardiography     |            |            |        |
| LAD (mm)             | 38.0±6.5   | 49.4±5.3   | <0.001 |
| LVEF (%)             | 62.1±12.1  | 56.0±11.1  | 0.11   |
| Medication           |            |            |        |
| ACE inhibitor/ARB    | 7 (36.8%)  | 12 (63.2%) | 0.19   |
| β-blocker            | 6 (31.6%)  | 13 (68.4%) | 0.023  |
| CCB                  | 12 (63.2%) | 5 (26.3%)  | 0.022  |
| ARNI                 | 0          | 0          | n/a    |
| Statin               | 11 (57.9%) | 3 (15.8%)  | 0.006  |
| Diuretic             | 1 (5.3%)   | 10 (52.6%) | 0.001  |
| SGLT2i               | 0          | 0          | n/a    |
| DPP4i                | 0          | 0          | n/a    |
| Insulin              | 0          | 0          | n/a    |
| Other anti-diabetics | 0          | 0          | n/a    |
| Steroid              | 0          | 0          | n/a    |

BMI: Body mass index; AVR: Aortic valve replacement; AS: Aortic stenosis; AR: Aortic regurgitation, MVR: Mitral valve replacement; MS: Mitral stenosis; MR: Mitral regurgitation; CABG: Coronary artery bypass grafting; AP: Angina pectoris; OMI: Old myocardial infarction; TAA: Thoracic aortic aneurysm; AAA: Abdominal aortic aneurysm; T2DM: Type 2 diabetes mellitus; NYHA: New York Heart Association (functional classification); TG: Triglyceride; HDL-C: High-density lipoprotein cholesterol; LDL-C: Low-density lipoprotein cholesterol; FBS: Fasting blood sugar; HbA1c: hemoglobin A1c; Ccr: Creatinine clearance; NT-proBNP: N-terminal prohormone of brain natriuretic peptide; LAD: Left atrial diameter; LVEF: Left ventricular ejection fraction; ACE: Angiotensin-converting enzyme; ARB: Angiotensin receptor blocker; CCB: Calcium channel blocker; ARNI: angiotensin receptor neprilysin inhibitor; SGLT2i: Sodium–glucose cotransporter 2 inhibitor; DPP4i: dipeptidyl peptidase 4 inhibitor; n/a: not applicable; Values are presented as numbers (percentage), median [25th-75th percentiles] or mean ± standard deviation.

**Supplemental Table 3.** Demographic characteristics of the study participants in Supplemental Figure 1.

|                                   |                 |
|-----------------------------------|-----------------|
| Patients, n                       | 25              |
| Age (year)                        | 72 (69–74)      |
| Male sex                          | 15 (60.0%)      |
| BMI (kg/m <sup>2</sup> )          | 22.67±3.00      |
| Surgery (combined)                |                 |
| AVR / AS, AR                      | 11              |
| MVR / MS, MR                      | 11              |
| CABG / AP, OMI                    | 6               |
| Other / TAA, AAA                  | 8               |
| Hypertension                      | 15 (60.0%)      |
| Dyslipidemia                      | 15 (60.0%)      |
| T2DM                              | 7 (28.0%)       |
| NYHA functional classification    |                 |
| I                                 | 5 (20.0%)       |
| II                                | 16 (64.0%)      |
| III                               | 4 (16.0%)       |
| IV                                | 0               |
| Laboratory data                   |                 |
| TG (mg/dl)                        | 109.12±69.42    |
| HDL-C (mg/dl)                     | 57.40±14.80     |
| LDL-C (mg/dl)                     | 110.98±39.09    |
| FBS (mg/dl)                       | 108.29±26.96    |
| HbA1c (%)                         | 6.09±0.49       |
| Ccr (ml/min/1.73 m <sup>2</sup> ) | 59.59±19.58     |
| NT-proBNP (pg/ml)                 | 1299 (214–1488) |
| Medication                        |                 |
| ACE inhibitor/ARB                 | 12 (48.0%)      |
| β-blocker                         | 11 (44.0%)      |

|                      |            |
|----------------------|------------|
| CCB                  | 10 (40.0%) |
| ARNI                 | 0          |
| Statin               | 11 (44.0%) |
| Diuretic             | 9 (36.0%)  |
| SGLT2i               | 2 (8.0%)   |
| DPP4i                | 0          |
| Insulin              | 0          |
| Other anti-diabetics | 0          |
| Steroid              | 0          |

---

BMI: Body mass index; AVR: Aortic valve replacement; AS: Aortic stenosis; AR: Aortic regurgitation, MVR: Mitral valve replacement; MS: Mitral stenosis; MR: Mitral regurgitation; CABG: Coronary artery bypass grafting; AP: Angina pectoris; OMI: Old myocardial infarction; TAA: Thoracic aortic aneurysm; AAA: Abdominal aortic aneurysm; T2DM: Type 2 diabetes mellitus; NYHA: New York Heart Association (functional classification); TG: Triglyceride; HDL-C: High-density lipoprotein cholesterol; LDL-C: Low-density lipoprotein cholesterol; FBS: Fasting blood sugar; HbA1c: hemoglobin A1c; Ccr: Creatinine clearance; NT-proBNP: N-terminal prohormone of brain natriuretic peptide; ACE: Angiotensin-converting enzyme; ARB: Angiotensin receptor blocker; CCB: Calcium channel blocker; ARNI: angiotensin receptor neprilysin inhibitor; SGLT2i: Sodium–glucose cotransporter 2 inhibitor; DPP4i: dipeptidyl peptidase 4 inhibitor. Values are presented as numbers (percentage), median [25th-75th percentiles] or mean  $\pm$  standard deviation.
